# Supplementary material for: Efficient fully-vacuum-processed perovskite solar cells using copper phthalocyanine as hole selective layers
Source: Royal Society of Chemistry journal article supplement (doi:10.1039/c5ta07829f), 2015-01-01
Supplement: c5ta07829f1.pdf [file c5ta07829f1.pdf]

## SUPPORTING INFORMATION

### **Efficient Fully-Vacuum-Processed Perovskite Solar Cells Using Copper Phthalocyanine as Hole Selective Layers**

Weijun Ke,<sup>ab</sup> Dewei Zhao,<sup>\*a</sup> Corey R. Grice,<sup>a</sup> Alexander J. Cimaroli,<sup>a</sup> Guojia Fang<sup>\*b</sup>  
and Yanfa Yan<sup>\*a</sup>

a. Department of Physics and Astronomy, and Wright Center for Photovoltaics  
Innovation and Commercialization, The University of Toledo, Toledo, OH 43606,  
USA. Email: dewei.zhao@utoledo.edu, yanfa.yan@utoledo.edu

b. Key Laboratory of Artificial Micro- and Nano-structures of Ministry of Education  
of China, School of Physics and Technology, Wuhan University, Wuhan 430072,  
China. Email: gjfang@whu.edu.cn

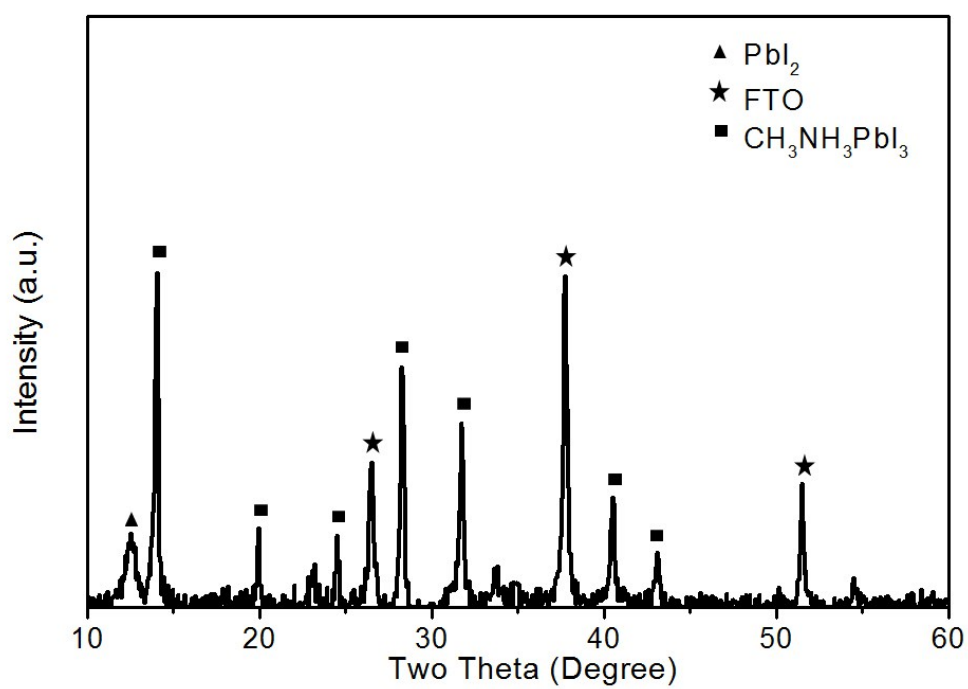

**Fig. S1** XRD pattern of a 370 nm perovskite film deposited on an FTO substrate covered with a 5.5 nm  $C_{60}$  ESL.

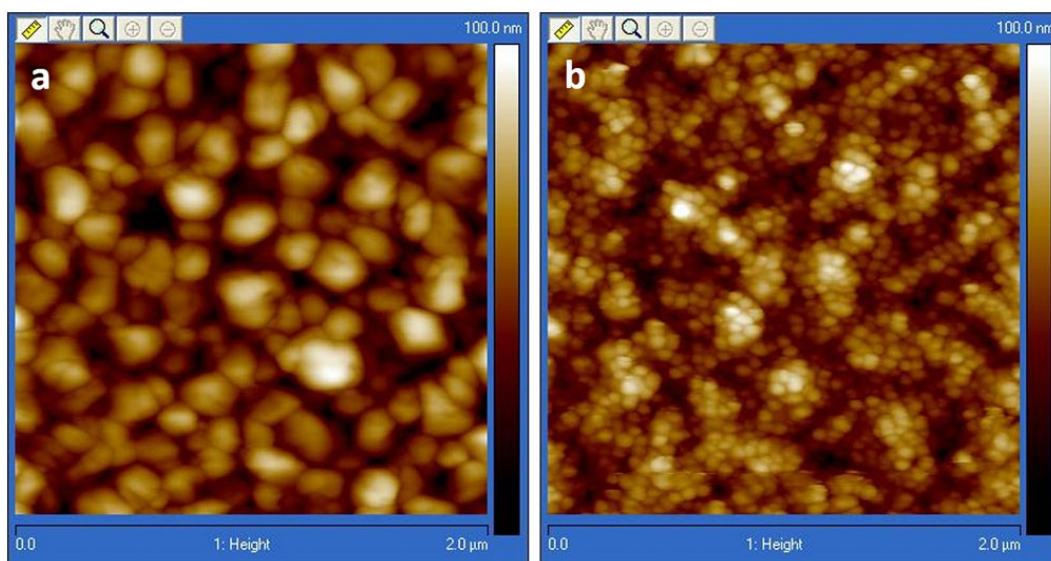

**Fig. S2** AFM images of (a) a 370 nm perovskite film deposited on an FTO substrate covered with a 5.5 nm C<sub>60</sub> ESL and (b) a 60 nm CuPc film deposited on a 370 nm perovskite film.

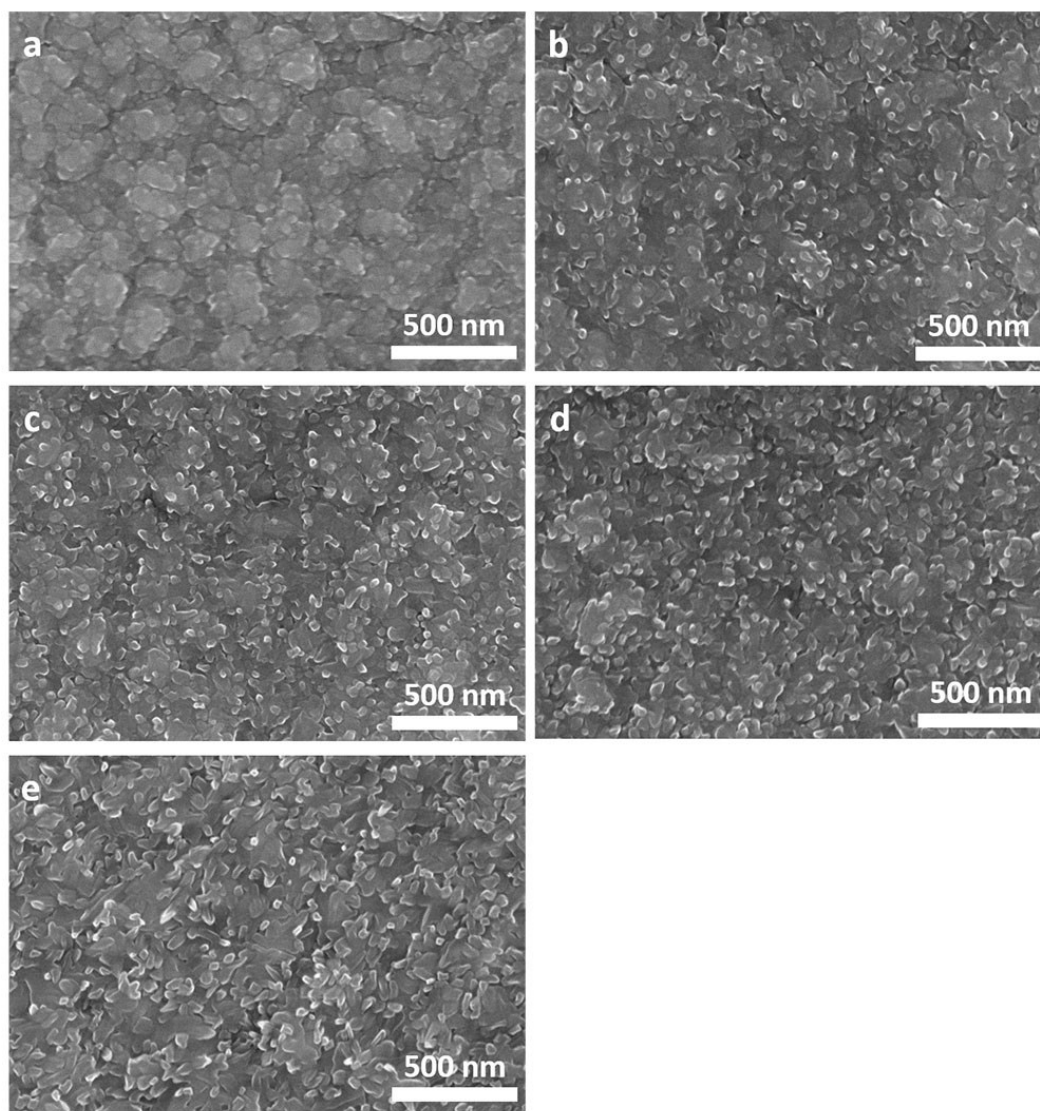

**Fig. S3** Top view SEM images of (a) a 20 nm, (b) a 40 nm (c) a 60 nm, (d) an 80 nm, and (e) a 100 nm CuPc films deposited on 370 nm perovskite films covered with 5.5 nm C<sub>60</sub> ESLs.

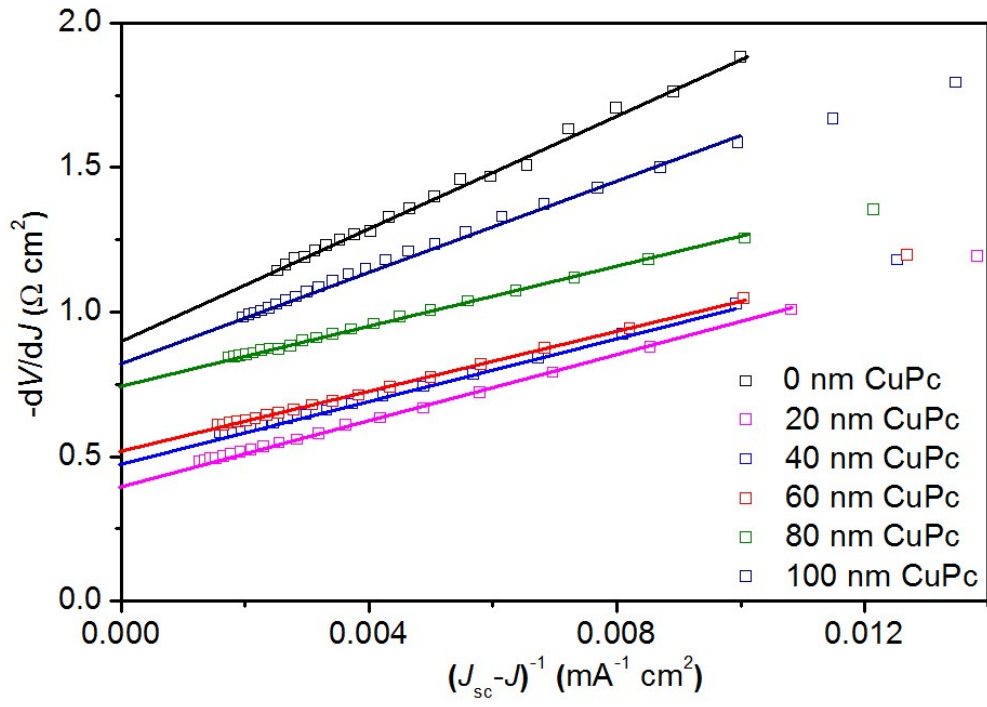

**Fig. S4** The linear curves of the relationship of  $-dV/dJ$  and  $(J_{sc} - J)^{-1}$ .

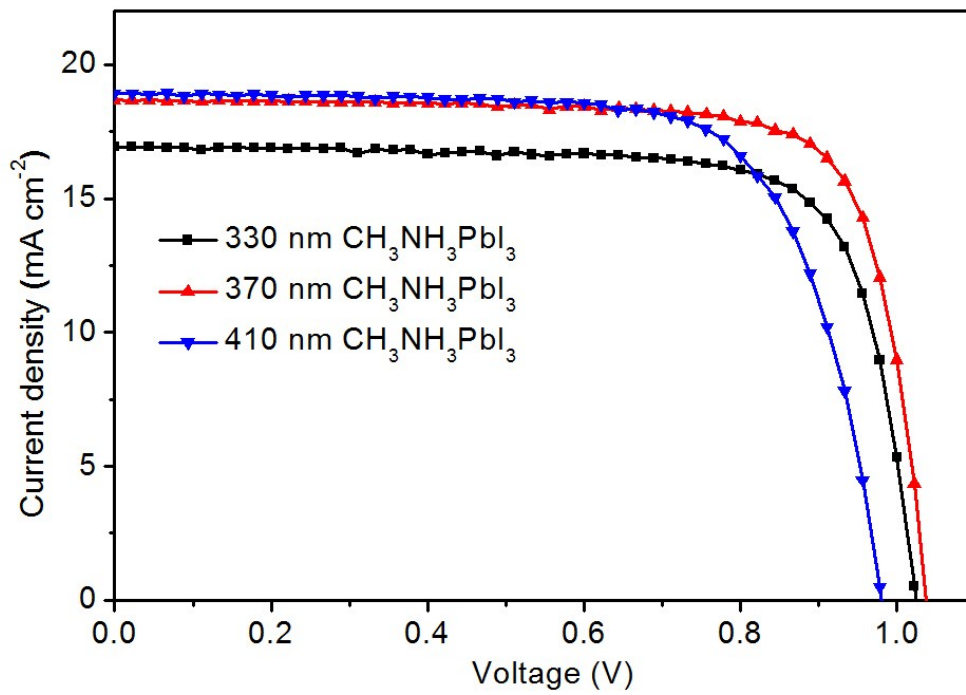

**Fig. S5**  $J$ - $V$  curves of the all-vacuum-processed perovskite solar cells using 60 nm CuPc HSLs and perovskite films with different thicknesses measured under reverse voltage scanning and AM1.5G illumination.

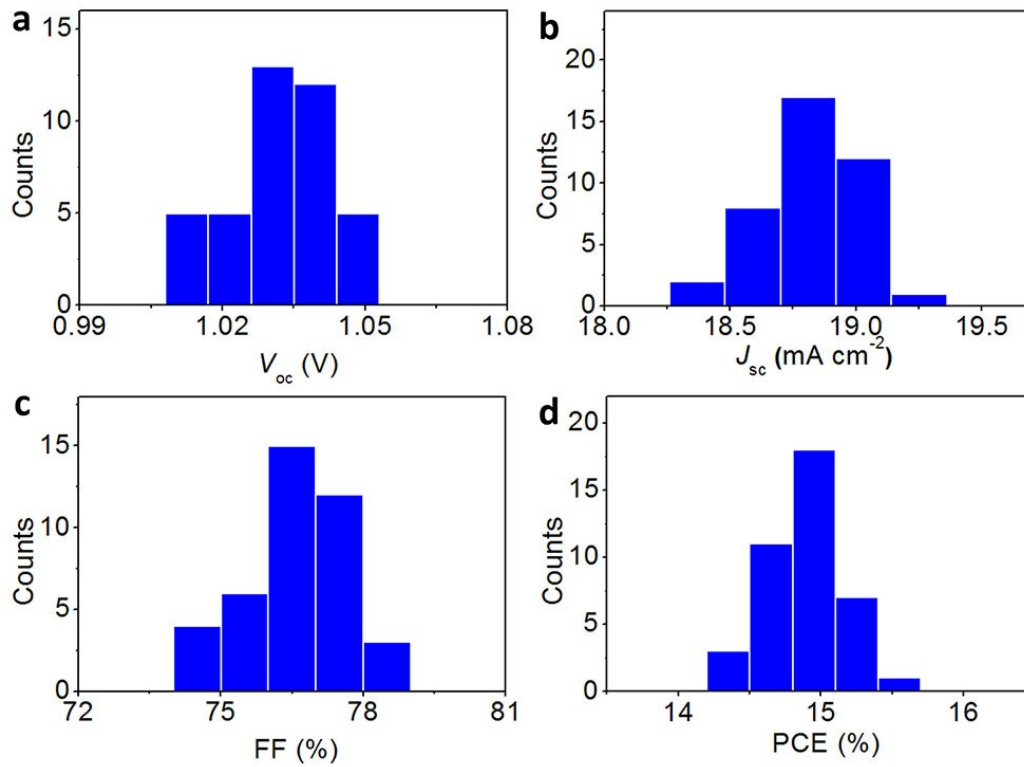

**Fig. S6** Histograms of (a)  $V_{oc}$ 's, (b)  $J_{sc}$ 's, (c) FFs, and (d) PCEs for 40 cells using 5.5 nm  $C_{60}$  ESLs, 370 nm  $CH_3NH_3PbI_3$  films, and 60 nm CuPc HSLs measured under reverse voltage scanning.

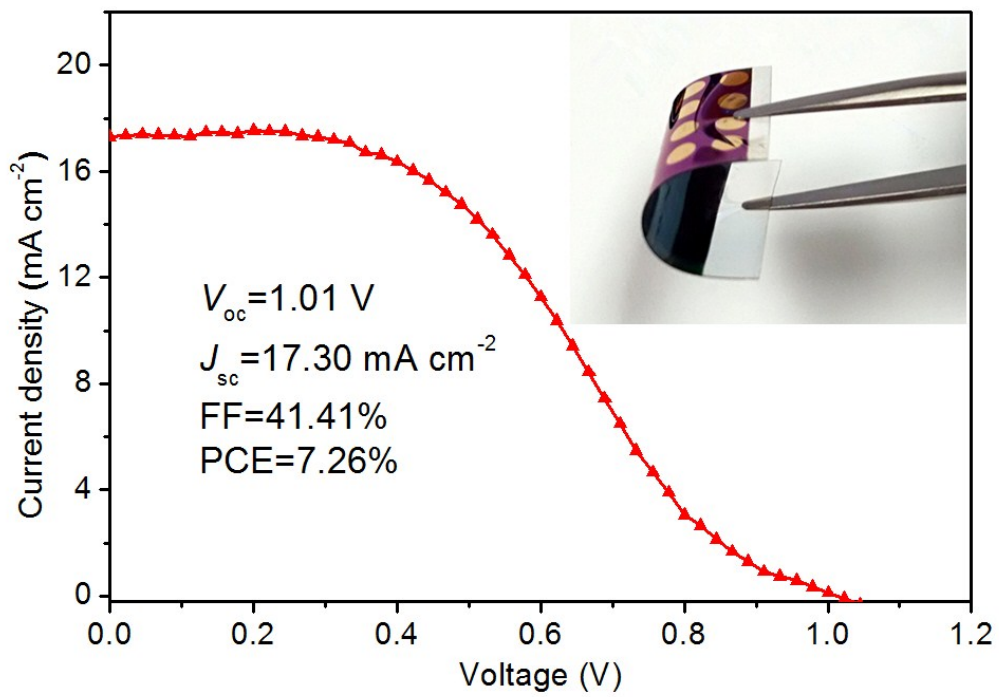

**Fig. S7**  $J$ - $V$  curve of the best-performing perovskite solar cell using a 5.5 nm C<sub>60</sub> ESL, a 370 nm CH<sub>3</sub>NH<sub>3</sub>PbI<sub>3</sub> film, and a 60 nm CuPc HSL on a PET/ITO flexible substrate measured under revers voltage scanning and AM1.5G illumination.



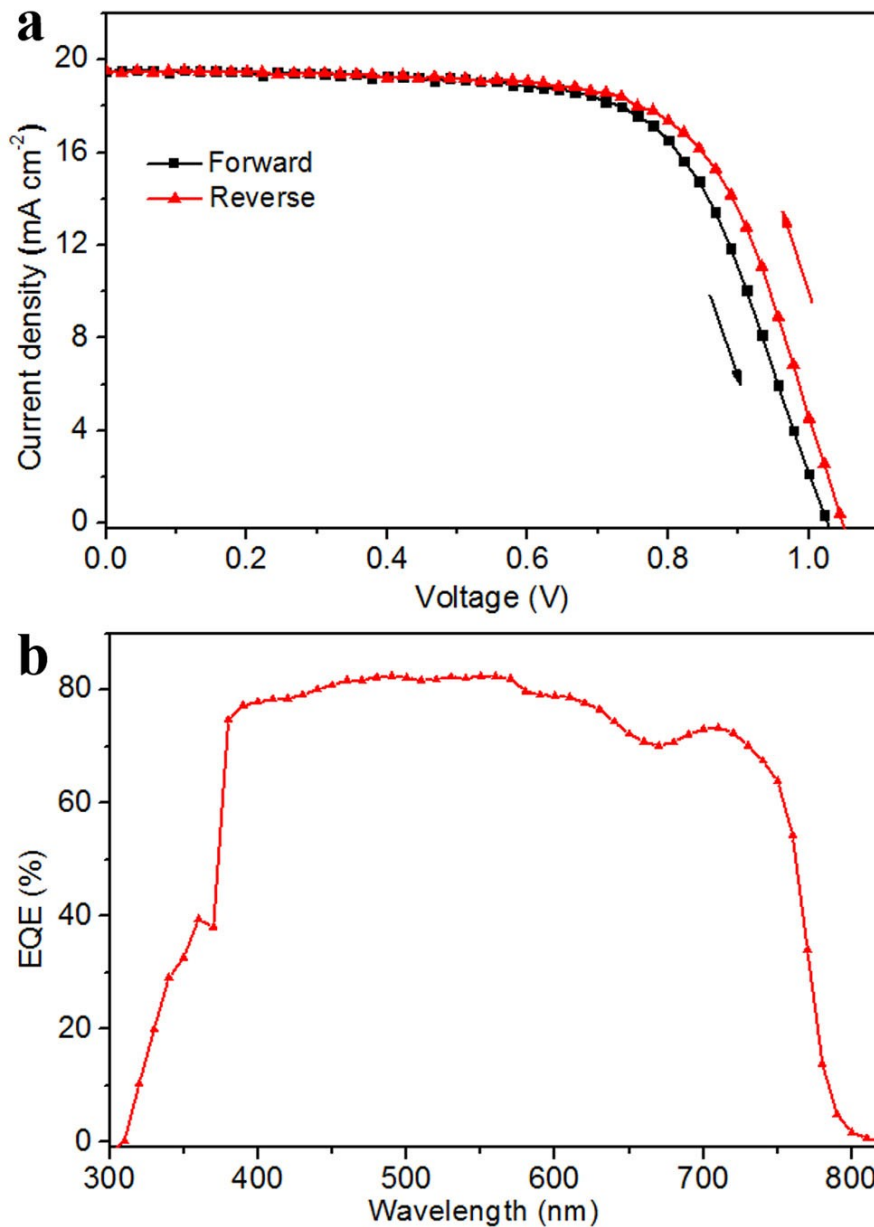

**Fig. S8** (a)  $J$ - $V$  curves of the best-performing perovskite solar cell using a 5.5 nm C<sub>60</sub> ESL, a 370 nm CH<sub>3</sub>NH<sub>3</sub>PbI<sub>3</sub> film, and a spiro-OMeTAD HSL measured under reverse and forward voltage scanning and AM1.5G illumination. (b) EQE spectrum of the best-performing cell using the spiro-OMeTAD HSL.

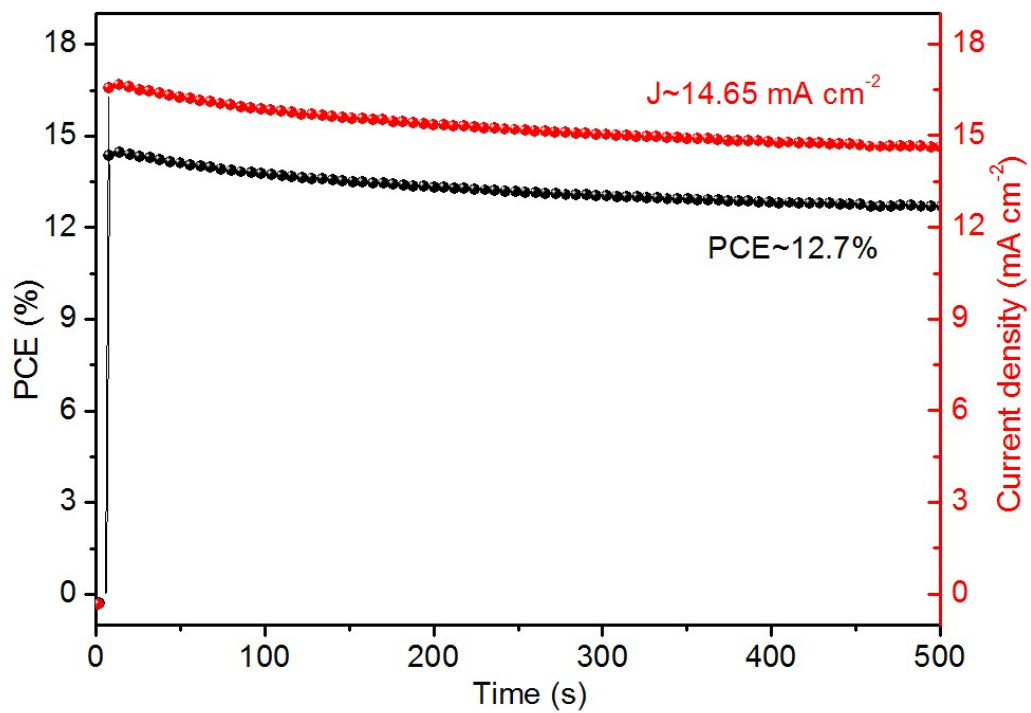

**Fig. S9** Steady-state efficiency of the best-performing perovskite solar cell using a 5.5 nm C<sub>60</sub> ESL, a 370 nm CH<sub>3</sub>NH<sub>3</sub>PbI<sub>3</sub> film, and a spiro-OMeTAD HSL at a constant bias voltage of 0.867 V and AM1.5G illumination.

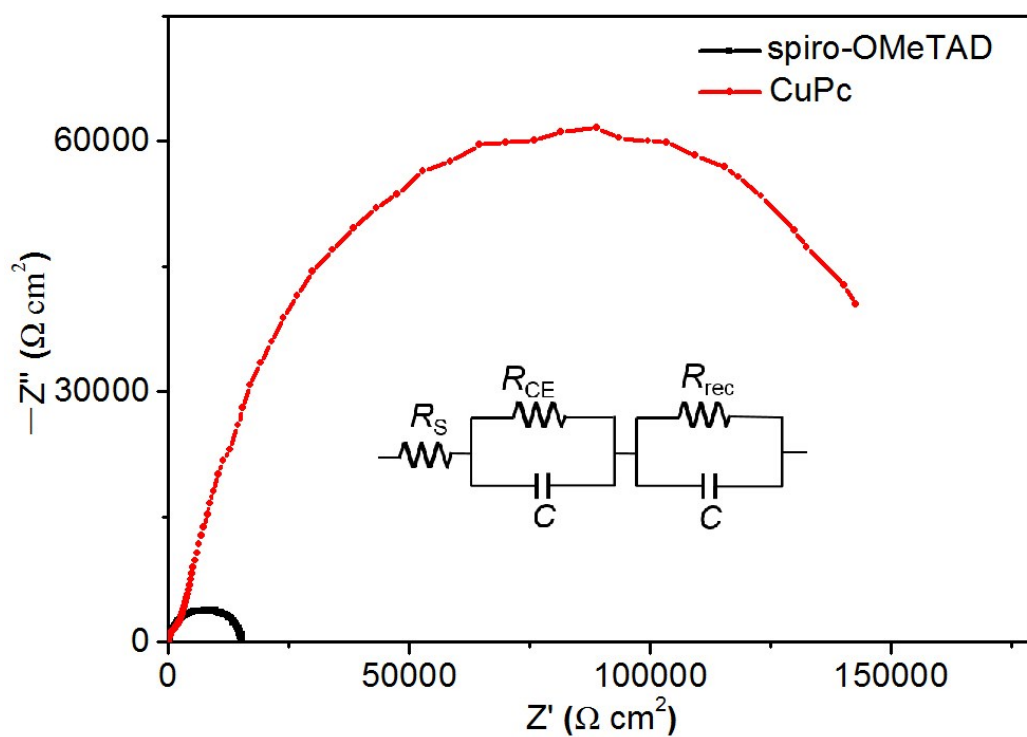

**Fig. S10** Nyquist plots of the perovskite solar cells using a spiro-OMeTAD HSL and a CuPc HSL in the dark.

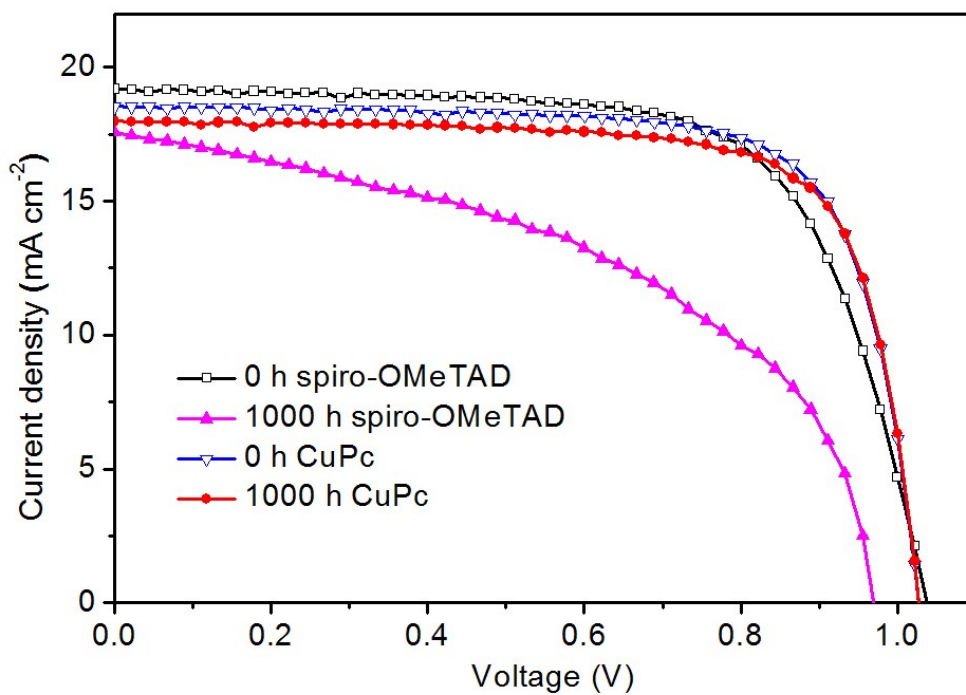

**Fig. S11**  $J$ - $V$  curves of the perovskite solar cells without encapsulation using a spiro-OMeTAD HSL and a CuPc HSL measured under reverse voltage scanning and AM1.5G illumination after fabrication and 500 h later with exposure to ambient air. These devices were stored in ambient air without illumination. The humidity of the atmosphere was about 20%.

**Table S1** Summary of photovoltaic parameters of the all-vacuum-processed perovskite solar cells using 60 nm CuPc HSLs and perovskite films with different thicknesses measured under reverse voltage scanning. The data are taken from Fig. S5.

| CH <sub>3</sub> NH <sub>3</sub> PbI <sub>3</sub> thickness<br>[nm] | $V_{oc}$<br>[V] | $J_{sc}$<br>[mA <sub>2</sub> cm <sup>-2</sup> ] | FF<br>[%] | PCE<br>[%] |
|--------------------------------------------------------------------|-----------------|-------------------------------------------------|-----------|------------|
| 330                                                                | 1.02            | 16.93                                           | 76.83     | 13.32      |
| 370                                                                | 1.04            | 18.68                                           | 78.23     | 15.15      |
| 410                                                                | 0.98            | 18.92                                           | 72.28     | 13.40      |

$V_{oc}$ , open circuit voltage);  $J_{sc}$ , short circuit current; FF, fill factor; PCE, power conversion efficiency.

**Table S2** Summary of photovoltaic parameters of the best-performing perovskite solar cells using 5.5 nm C<sub>60</sub> ESLs, 370 nm CH<sub>3</sub>NH<sub>3</sub>PbI<sub>3</sub> films, a spiro-OMeTAD HSL and a CuPc HSL measured under different voltage scanning with AM1.5G illumination. The data are taken from Fig. 5a and Fig. S8a.

|                      | $V_{oc}$<br>[V] | $J_{sc}$<br>[mA <sub>2</sub> cm <sup>-2</sup> ] | FF<br>[%] | PCE<br>[%] |
|----------------------|-----------------|-------------------------------------------------|-----------|------------|
| Spiro-OMeTAD Reverse | 1.05            | 19.55                                           | 67.74     | 13.89      |
| Spiro-OMeTAD Forward | 1.03            | 19.48                                           | 66.78     | 13.36      |
| Spiro-OMeTAD Average | 1.04            | 19.52                                           | 67.26     | 13.63      |
| CuPc Reverse         | 1.04            | 19.13                                           | 77.47     | 15.42      |
| CuPc Forward         | 1.02            | 19.04                                           | 72.25     | 13.98      |
| CuPc Average         | 1.03            | 19.09                                           | 74.86     | 14.7       |

**Table S3** Summary of photovoltaic parameters of the perovskite solar cells without encapsulation using a spiro-OMeTAD HSL and a CuPc HSL measured under reverse voltage scanning and AM1.5G illumination after fabrication and 1000 h later with exposure to ambient air. The data are taken from Fig. S11.

|                     | $V_{oc}$<br>[V] | $J_{sc}$<br>[mA cm <sup>-2</sup> ] | FF<br>[%] | PCE<br>[%] |
|---------------------|-----------------|------------------------------------|-----------|------------|
| 0 h Spiro-OMeTAD    | 1.04            | 19.19                              | 68.59     | 13.66      |
| 1000 h Spiro-OMeTAD | 0.97            | 17.57                              | 49.18     | 8.38       |
| 0 h CuPc            | 1.03            | 18.54                              | 74.63     | 14.21      |
| 1000 h CuPc         | 1.03            | 17.98                              | 74.83     | 13.83      |
